# Supplementary material for: Insight into the Removal of Enoxacin in an Anaerobic Sulfur-Mediated Wastewater Treatment System: Performance, Kinetics and Mechanisms
Source: MDPI journal article supplement (doi:10.3390/w14182896), 2022-09-16
Supplement: s1 [file s1]

Supplementary Information (SI) for

**Insight into the removal of enoxacin in an anaerobic sulfur-mediated  
wastewater treatment system: performance, kinetics and mechanisms**

## **LIST OF TABLES**

Table S1 Physical and chemical properties of ENO

Table S2 Composition of synthetic wastewater

Table S3 Batch experimental program for ENO adsorption and biodegradation by  
sulfate-reducing sludge

Table S4 Performance of SRUSB bioreactor at different initial ENO concentrations

Table S5 Adsorption kinetic (pseudo-first-order and pseudo-second-order) parameters  
for ENO adsorption onto sulfate-reducing sludge

Table S6 Adsorption isotherm (Henry, Freundlich, and Langmuir) parameters of ENO  
by sulfate-reducing sludge under different temperature

Table S7 Thermodynamic parameters of ENO adsorption onto sulfate-reducing sludge

Table S8 Biodegradation kinetic (zero, first and second-order) parameters for ENO in  
sulfate-reducing sludge system

## **LIST OF FIGURES**

Figure S1 Schematic diagram of the lab-scale SRUSB bioreactor

Figure S2 Microbial community characterization of sulfate-reducing sludge samples  
from SRUSB bioreactor at each stage at phylum (A) (relative abundance  $> 0.1\%$ ); and genus (relative abundance  $> 0.1\%$ ) (B) levels

## Chemical and reagents

Enoxacin (ENO, 99% purity) and enoxacin-d8 (99% purity) were purchased from Dr. Ehrenstorfer GmbH (Augsburg, Germany). The important physico-chemical properties of ENO were shown in **Table S1** in Supplementary Information (SI). HPLC-grade methanol, acetonitrile and formic acid were purchased from Labscience, Inc. (MA, USA). Oasis HLB (200 mg/6 mL) was purchased from Waters (MA, USA), 0.22- $\mu$ m filter membrane was purchased from Jinteng (Tianjin, China). Ultra-pure water from Millipore System (Millipore, MA, USA) was used for preparing all the standards. The stock solutions of ENO were prepared at a concentration of 100 mg/L using methanol and stored in the dark at 4°C until further use.

## Sulfate-reducing sludge used in batch experiments

The sulfate-reducing sludge used in batch experiments was taken from the SRUSB bioreactor after 366 days of continuous operation, and then washed using synthetic wastewater (see **Table S2** in SI for composition) for three times with centrifugation (1793 $\times$ g) for separation of sludge pellets between two times of washing, until no residual ENO detected in the sulfate-reducing sludge.

## ENO removal efficiency and specific removal rate

The removal efficiency and specific removal rate ( $q$ ) of ENO were calculated using the following equations:

$$\text{Removal efficiency (\%)} = \frac{Q_{In} - Q_{En}}{Q_{In}} \times 100\% \quad (S1)$$

$$q = \frac{Q_{In} - Q_{En}}{m} \quad (S2)$$

Where,  $q$  is specific removal rate ( $\mu\text{g/g/d}$ );  $Q_{In}$  is the mass of ENO flowing into the SRUSB bioreactor daily ( $\mu\text{g/d}$ );  $Q_{En}$  is the mass of ENO flowing out from the SRUSB reactor daily ( $\mu\text{g/d}$ );  $m$  is the total mass of sludge (suspended solids) in reactor (g-SS).

The adsorption removal efficiency and the specific adsorption rate ( $q_s$ ) of ENO were calculated using the Eq. (S3) and Eq. (S4):

$$\text{Removal efficiency (\%)} = \frac{\Delta Q_S}{Q_{In}} \times 100\% \quad (\text{S3})$$

$$q_s = \frac{\Delta Q_S}{m} \quad (\text{S4})$$

where,  $\Delta Q_S = Q_{S(t+1)} - Q_{S(t)}$

where,  $q_s$  is specific sorption rate ( $\mu\text{g/g/d}$ );  $Q_{S(t+1)}$  the mass of ENO in sulfate-reducing sludge detected on Day  $t+1$  ( $\mu\text{g/d}$ );  $Q_{S(t)}$  is the mass of ENO in sulfate-reducing sludge detected on Day  $t$  ( $\mu\text{g/d}$ );  $Q_{In}$  is the mass of ENO flowing into the SRUSB bioreactor daily ( $\mu\text{g/d}$ );  $m$  is the total mass of sludge (suspended solids) in reactor (g-SS).

The biodegradation removal efficiency and the specific biodegradation rate ( $q_b$ ) of ENO were calculated using Eq. (S5) and Eq. (S6):

$$\text{Removal efficiency (\%)} = \frac{(Q_{In} - Q_{En} - \Delta Q_S)}{Q_{In}} \times 100\% \quad (\text{S5})$$

$$q_b = \frac{(Q_{In} - Q_{En} - \Delta Q_S)}{m} \quad (\text{S6})$$

where,  $\Delta Q_S = Q_{S(t+1)} - Q_{S(t)}$ ;  $q_b$  is specific biodegradation rate ( $\mu\text{g/g/d}$ );  $Q_{In}$  is the mass of ENO flowing into the SRUSB bioreactor daily ( $\mu\text{g/d}$ );  $Q_{En}$  is the mass of ENO flowing out from the SRUSB reactor daily ( $\mu\text{g/d}$ );  $Q_{S(t+1)}$  the mass of ENO in sulfate-reducing sludge detected on Day  $t+1$  ( $\mu\text{g/d}$ );  $Q_{S(t)}$  is the mass of ENO in

sulfate-reducing sludge detected on Day  $t$  ( $\mu\text{g/d}$ );  $m$  is the total mass of sludge (suspended solids) in reactor (g-SS).

### Adsorption isotherms and thermodynamics

Three adsorption isotherms (Henry, Freundlich and Langmuir) (Eq. (S7), Eq. (S8) and Eq. (S9)) were applied for ENO adsorption at a set of reaction temperatures (i.e., 5, 10, 15, 20, 25, 30 and 35°C) in batch experiments.

$$q_e = k_H C_e \quad (\text{S7})$$

$$q_e = k_f C_e^{1/n} \quad (\text{S8})$$

$$q_e = \frac{k_L q_m C_e}{1 + k_L C_e} \quad (\text{S9})$$

Where,  $k_d$  is the Henry adsorption coefficient (L/g),  $k_f$  is the binding energy constant reflecting the affinity of adsorbents to ENO;  $n$  is the Freundlich nonlinearity index;  $q_e$  is the mass of ENO adsorbed onto sulfate-reducing sludge at equilibrium ( $\mu\text{g/g}$ );  $q_m$  is the theoretical maximum adsorption capacity of ENO by sulfate-reducing sludge ( $\mu\text{g/g}$ );  $k_L$  is the Langmuir constant related to adsorption energy (L/ $\mu\text{g}$ ).

The thermodynamic process, including parameters such as Gibbs free energy ( $\Delta G^\circ$ ), enthalpy change ( $\Delta H^\circ$ ), and entropy changes ( $\Delta S^\circ$ ), were used to evaluate the feasibility and nature of the adsorption process, and calculated with the following Eq. (S10), Eq. (S11) and Eq. (S12):

$$\Delta G^\circ = \Delta H^\circ - T\Delta S^\circ \quad (\text{S10})$$

$$\ln k_H = -\frac{\Delta H^\circ}{RT} + \frac{\Delta S^\circ}{R} \quad (\text{S11})$$

$$\Delta G^\circ = -RT \ln k_H \quad (\text{S12})$$

where,  $k_f$  is the Freundlich constant;  $R$  is the ideal gas constant (8.314 J/mol/K);  $T$  is the absolute temperature (K);  $\Delta G^o$  is Gibbs free energy (kJ/mol);  $\Delta H^o$  is enthalpy change (kJ/mol);  $\Delta S^o$  is standard entropy changes (J/K/mol).

### **ENO analyses**

The ENO in aqueous phase (influent and effluent) and sludge samples was determined regularly by an ultra-performance liquid chromatography (UPLC) with a DAD detector (Dionex, UltiMate 3000, CA, USA) using a Acclaim<sup>120</sup> C18 column (2.1×150 mm, 3  $\mu$ m, Dionex, CA, USA) under mobile phase A (75% of ultra-pure water with 0.1% formic acid) and phase B (25% of acetonitrile). The flow rate, column oven temperature and injection volume were 0.3 mL/min, 30°C and 25  $\mu$ L, respectively. The monitoring was carried out at wavelength of 285 nm.

In the case of the solid phase (sulfate-reducing sludge), the samples were frozen and lyophilized. The dried sludge was extracted successively at room temperature in an ultrasonic bath three times with extraction solvent (methanol, sodium citrate buffer solution, EDTA buffer solution at a ratio of 3:1:1, v/v), evaporated and re-dissolved the samples with water and pre-concentrated by solid-phase extraction (SPE). An isotopically labelled internal standard (i.e., Enoxacin-d8) was added into the samples and used to correct for matrix effects during SPE. HLB cartridges (6 mL/200 mg, Waters, Sunnyvale, MA, USA) were used after preconditioning with 3×3 mL of menthol, 3 mL of menthol containing 0.1% formic acid, and 2×3 mL of ultra-pure water. Then, re-dissolved liquor percolated through the cartridges at 5 mL/min. The cartridges were subsequently air-dried by vacuum. Thereafter, the cartridges were eluted with 3×3

mL of menthol, and the eluent was dried by evaporation under a flow of nitrogen, and finally re-dissolved with 1 mL of acetonitrile/ultra-pure water with 0.1% formic acid (25:75, v/v) for ENO analysis using UPLC-DAD.

**Table S1** Physical and chemical properties of ENO

| Name | Chemical formula                                               | Molecular weight | pKa        | LogKow | Molecular structure                                                                 |
|------|----------------------------------------------------------------|------------------|------------|--------|-------------------------------------------------------------------------------------|
| ENO  | C <sub>15</sub> H <sub>17</sub> FN <sub>4</sub> O <sub>3</sub> | 320.32           | 6.3<br>8.7 | -0.2   | 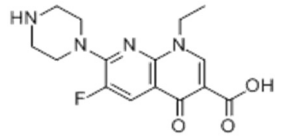 |



**Table S2** Composition of synthetic wastewater

| Constituents                    | Concentration (mg/L) |
|---------------------------------|----------------------|
| Sodium acetate                  | 640.6                |
| NH <sub>4</sub> Cl              | 95.5                 |
| CaCl <sub>2</sub>               | 26.0                 |
| MgCl <sub>2</sub>               | 38.9                 |
| K <sub>2</sub> HPO <sub>4</sub> | 7.2                  |
| K <sub>2</sub> HPO <sup>3</sup> | 19.2                 |
| Na <sub>2</sub> SO <sub>4</sub> | 1213.0               |

**Table S3** Batch experimental program for ENO adsorption and biodegradation by sulfate-reducing sludge

| Groups | Synthetic wastewater | Sulfate-reducing sludge (1.5 g-SS/L) | ENO | 0.1% NaN <sub>3</sub> | Operation time | Removal mechanisms                         |
|--------|----------------------|--------------------------------------|-----|-----------------------|----------------|--------------------------------------------|
| I      | +                    | -                                    | +   | -                     | 5 days         | hydrolysis                                 |
| II     | +                    | +                                    | +   | +                     | 24 hrs         | adsorption                                 |
| II     | +                    | +                                    | +   | -                     | 5 days         | hydrolysis<br>adsorption<br>biodegradation |

**Table S4** Performance of SRUSB bioreactor at different initial ENO concentrations

| Parameters                                                                               | Influent* | Effluent* |           |           |           |            |           |            |
|------------------------------------------------------------------------------------------|-----------|-----------|-----------|-----------|-----------|------------|-----------|------------|
|                                                                                          |           | Stage 1   | Stage 2   | Stage 3   | Stage 4   | Stage 5    | Stage 6   | Stage 7    |
| COD (mg/L)                                                                               | 481.2±9.1 | 71.5±4.7  | 70.2±2.7  | 70.8±2.9  | 69.1±5.3  | 68.6±2.6   | 68.7±4.3  | 67.3±4.8   |
| SO <sub>4</sub> <sup>2-</sup> (mg S/L)                                                   | 268.1±4.9 | 107.1±8.5 | 107.2±6.7 | 107.3±7.6 | 105.9±3.4 | 106.1±2.1  | 104.9±3.8 | 104.3±2.7  |
| SO <sub>3</sub> <sup>2-</sup> (mg S/L)                                                   | ND        | ND        | ND        | ND        | ND        | ND         | ND        | ND         |
| S <sub>2</sub> O <sub>3</sub> <sup>2-</sup> (mg S/L)                                     | ND        | ND        | ND        | ND        | ND        | ND         | ND        | ND         |
| Total dissolved sulfide<br>(H <sub>2</sub> S+HS <sup>-</sup> +S <sup>2-</sup> ) (mg S/L) | ND        | 144.5±8.0 | 144.7±8.9 | 145.6±4.3 | 146.1±7.0 | 146.8±11.2 | 147.0±8.7 | 147.9±10.5 |
| pH                                                                                       | 7.0       | 7.6±0.2   | 7.5±0.4   | 7.6±0.5   | 7.5±0.2   | 7.6±0.4    | 7.6±0.8   | 7.6±0.7    |
| ORP (mv)                                                                                 | -         | -463±5.0  | -461±3.1  | -473±4.7  | -461±7.1  | -469±5.8   | -459±4.1  | -465±4.5   |

\*Mean value ± standard deviation

ND: Not detectable

**Table S5** Adsorption kinetic (pseudo-first-order and pseudo-second-order) parameters for ENO adsorption onto sulfate-reducing sludge

| Concentration<br>( $\mu\text{g/L}$ ) | $k_d$<br>( $\text{L/g}$ ) | Experimental data               | Pseudo-first-order         |                                 |       | Pseudo-second-order                    |                                 |       |
|--------------------------------------|---------------------------|---------------------------------|----------------------------|---------------------------------|-------|----------------------------------------|---------------------------------|-------|
|                                      |                           | $q_e$<br>( $\mu\text{g/g SS}$ ) | $k_1$<br>( $1/\text{hr}$ ) | $q_e$<br>( $\mu\text{g/g SS}$ ) | $r^2$ | $k_2$<br>( $\text{g}/\mu\text{g/hr}$ ) | $q_e$<br>( $\mu\text{g/g SS}$ ) | $r^2$ |
| 100                                  | 22.68 $\pm$ 2.1           | 53.8                            | 0.51 $\pm$ 0.037           | 2.49 $\pm$ 0.25                 | 0.711 | 1.73 $\pm$ 0.11                        | 53.8 $\pm$ 4.11                 | 0.999 |
| 300                                  | 23.47 $\pm$ 1.7           | 157.4                           | 0.31 $\pm$ 0.015           | 0.59 $\pm$ 0.13                 | 0.381 | 1.02 $\pm$ 0.021                       | 156.25 $\pm$ 3.93               | 0.999 |
| 500                                  | 22.79 $\pm$ 0.9           | 269.9                           | 0.30 $\pm$ 0.003           | 0.96 $\pm$ 0.07                 | 0.382 | 0.68 $\pm$ 0.045                       | 270.27 $\pm$ 6.07               | 0.999 |
| 1000                                 | 23.88 $\pm$ 1.3           | 605.2                           | 0.49 $\pm$ 0.025           | 1.34 $\pm$ 0.15                 | 0.554 | 0.72 $\pm$ 0.012                       | 588.23 $\pm$ 9.12               | 0.998 |
| 3000                                 | 28.27 $\pm$ 0.7           | 1546.8                          | 0.48 $\pm$ 0.032           | 1.75 $\pm$ 0.03                 | 0.483 | 0.51 $\pm$ 0.042                       | 1666.7 $\pm$ 7.06               | 0.964 |
| 5000                                 | 28.94 $\pm$ 1.4           | 2752.8                          | 0.49 $\pm$ 0.024           | 1.81 $\pm$ 0.09                 | 0.496 | 0.8 $\pm$ 0.091                        | 2528.01 $\pm$ 10.22             | 0.973 |

**Table S6** Adsorption isotherm (Henry, Freundlich, and Langmuir) parameters of ENO by sulfate-reducing sludge under different temperature

| Temperature | Henry       |       | Freundlich |       |       | Langmuir                   |              |       |
|-------------|-------------|-------|------------|-------|-------|----------------------------|--------------|-------|
| (°C)        | $k_H$ (L/g) | $r^2$ | $k_F$      | 1/n   | $r^2$ | $k_L \times 10^{-2}$ (L/g) | $q_m$ (μg/g) | $r^2$ |
| 5           | 125.36±3.61 | 0.996 | 35.3±1.35  | 0.695 | 0.990 | 7.93±0.89                  | 434.78±4.75  | 0.975 |
| 10          | 81.94±1.94  | 0.995 | 25.04±2.54 | 0.732 | 0.990 | 5.35±0.53                  | 500.00±8.09  | 0.971 |
| 15          | 52.17±2.31  | 0.997 | 20.80±0.82 | 0.804 | 0.995 | 3.11±0.13                  | 714.28±8.25  | 0.972 |
| 20          | 36.84±2.48  | 0.995 | 16.00±3.51 | 0.825 | 0.992 | 2.52±0.05                  | 666.67±7.69  | 0.964 |
| 25          | 27.99±0.99  | 0.996 | 12.69±2.63 | 0.848 | 0.987 | 1.78±0.08                  | 769.23±6.29  | 0.937 |
| 30          | 19.56±1.65  | 0.998 | 7.41±1.34  | 0.817 | 0.990 | 1.37±0.03                  | 666.68±9.18  | 0.978 |
| 35          | 13.51±1.50  | 0.999 | 3.89±0.78  | 0.800 | 0.990 | 1.02±0.15                  | 526.32±5.56  | 0.952 |

**Table S7** Thermodynamic parameters of ENO adsorption onto sulfate-reducing sludge

| Temperature (°C) | $\Delta G^\circ$ (KJ/mol) | $\Delta H^\circ$ (KJ/mol) | $\Delta S^\circ$ (J/(mol/K)) |
|------------------|---------------------------|---------------------------|------------------------------|
| 5                | -51.354                   |                           |                              |
| 10               | -51.364                   |                           |                              |
| 15               | -51.373                   |                           |                              |
| 20               | -51.381                   | -51.882                   | -146.738                     |
| 25               | -51.390                   |                           |                              |
| 30               | -51.398                   |                           |                              |
| 35               | -51.406                   |                           |                              |

**Table S8** Biodegradation kinetic (zero, first and second-order) parameters for ENO in sulfate-reducing sludge system

| Concentrations<br>( $\mu\text{g/L}$ ) | Zero-order kinetic              |                  |       | First-order kinetic |                  |       | Second-order kinetic                                  |                  |       |
|---------------------------------------|---------------------------------|------------------|-------|---------------------|------------------|-------|-------------------------------------------------------|------------------|-------|
|                                       | $K_0'$<br>( $\mu\text{g/L/d}$ ) | $t_{1/2}$<br>(d) | $r^2$ | $K_1'$ ( $d^{-1}$ ) | $t_{1/2}$<br>(d) | $r^2$ | $K_2' \times 10^{-2}$<br>( $\text{L}/\mu\text{g/d}$ ) | $t_{1/2}$<br>(d) | $r^2$ |
| 100                                   | 3.30 $\pm$ 0.10                 | 15.88            | 0.984 | 0.034 $\pm$ 0.0009  | 20.26            | 0.988 | 0.04 $\pm$ 0.02                                       | 23.85            | 0.980 |
| 300                                   | 17.14 $\pm$ 4.81                | 8.75             | 0.997 | 0.067 $\pm$ 0.0010  | 10.35            | 0.997 | 0.03 $\pm$ 0.01                                       | 11.14            | 0.991 |
| 500                                   | 23.91 $\pm$ 8.73                | 10.60            | 0.981 | 0.053 $\pm$ 0.0002  | 13.05            | 0.989 | 0.01 $\pm$ 0.003                                      | 19.75            | 0.986 |
| 1000                                  | 55.10 $\pm$ 5.69                | 9.51             | 0.995 | 0.061 $\pm$ 0.0001  | 11.45            | 0.994 | 0.007 $\pm$ 0.002                                     | 13.64            | 0.987 |
| 3000                                  | 154.66 $\pm$ 11.53              | 9.78             | 0.982 | 0.058 $\pm$ 0.0010  | 12.00            | 0.982 | 0.002 $\pm$ 0.001                                     | 16.52            | 0.975 |
| 5000                                  | 263.95 $\pm$ 16.27              | 9.51             | 0.985 | 0.060 $\pm$ 0.0002  | 11.61            | 0.985 | 0.001 $\pm$ 0.001                                     | 19.91            | 0.981 |

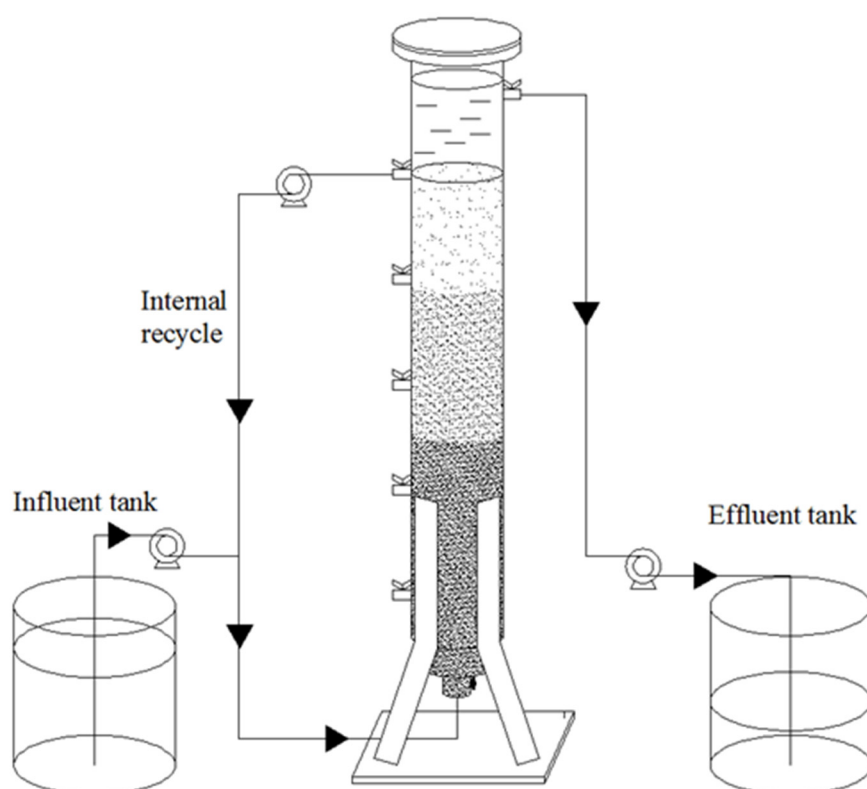

**Figure S1** Schematic diagram of the lab-scale SRUSB bioreactor



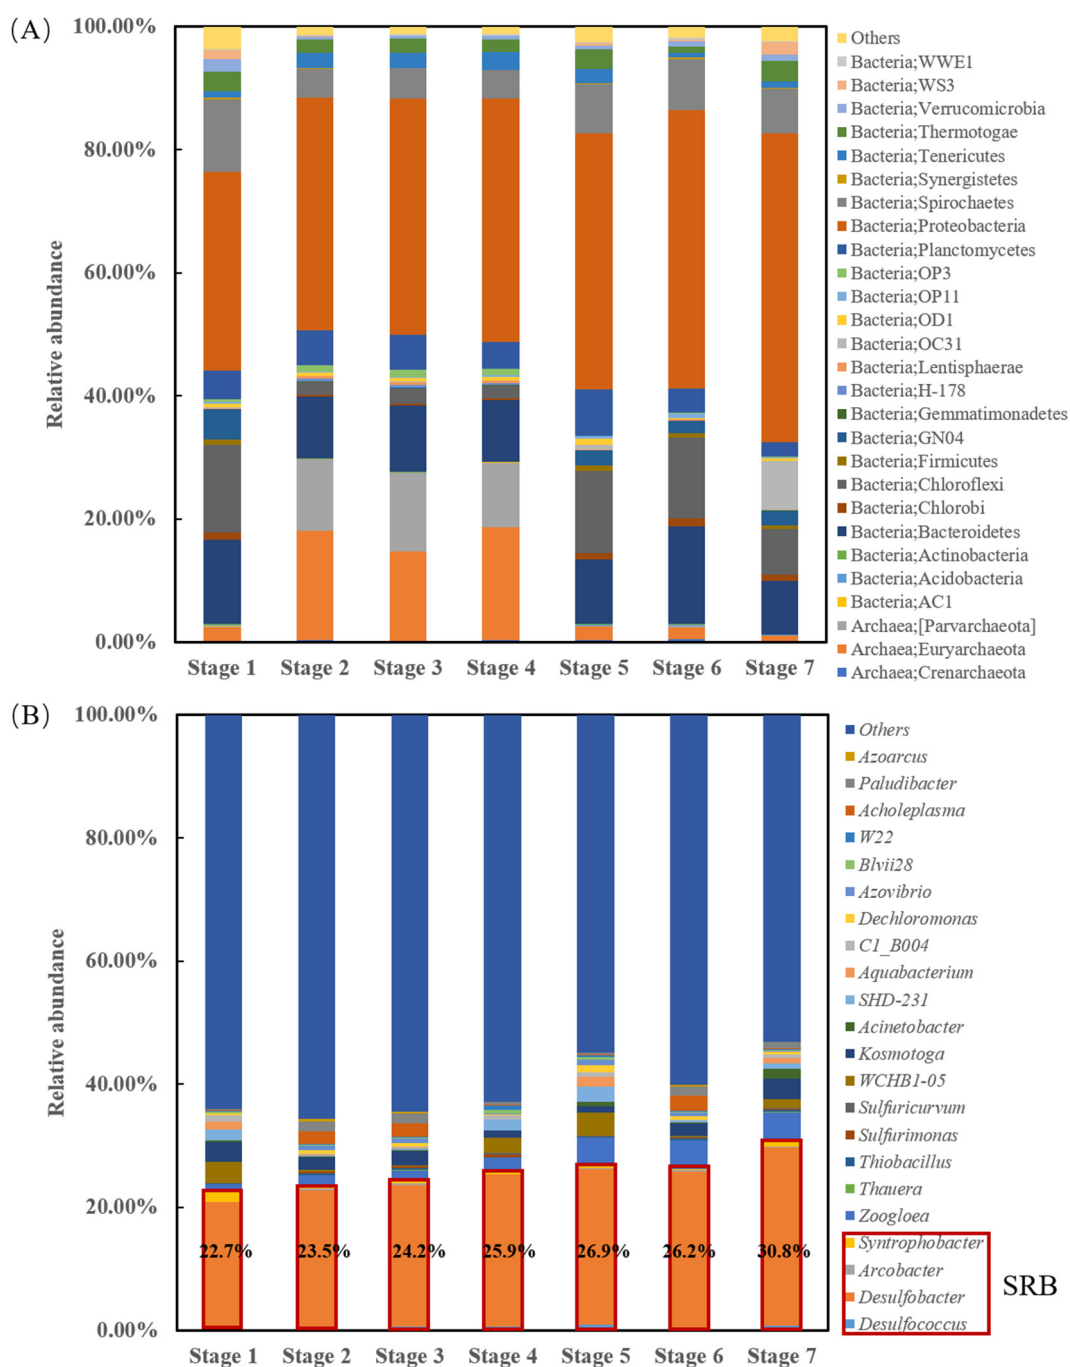

**Figure S2** Microbial community characterization of sulfate-reducing sludge samples from SRUSB bioreactor at each stage at phylum (A) (relative abundance > 0.1%); and genus (relative abundance > 0.1%) (B) levels (Others include that microorganism of relative abundance less than 0.1% and unclassified).
